# Supplementary material
Source: PubMed Central journal article supplement (PMC9448510)

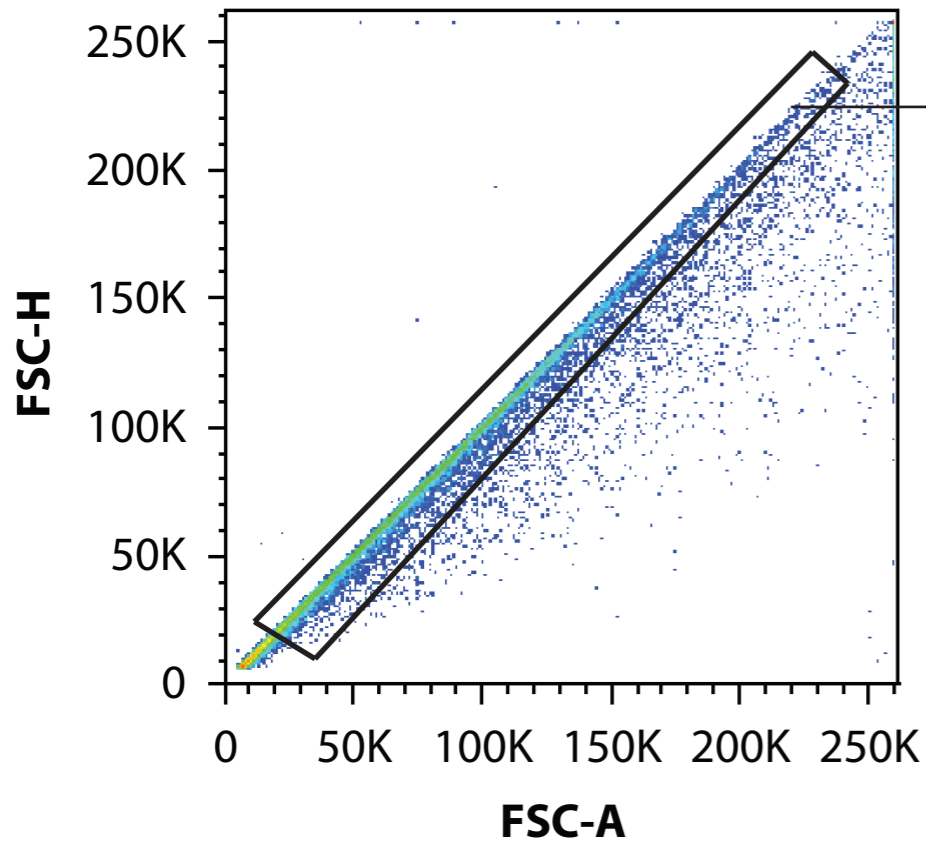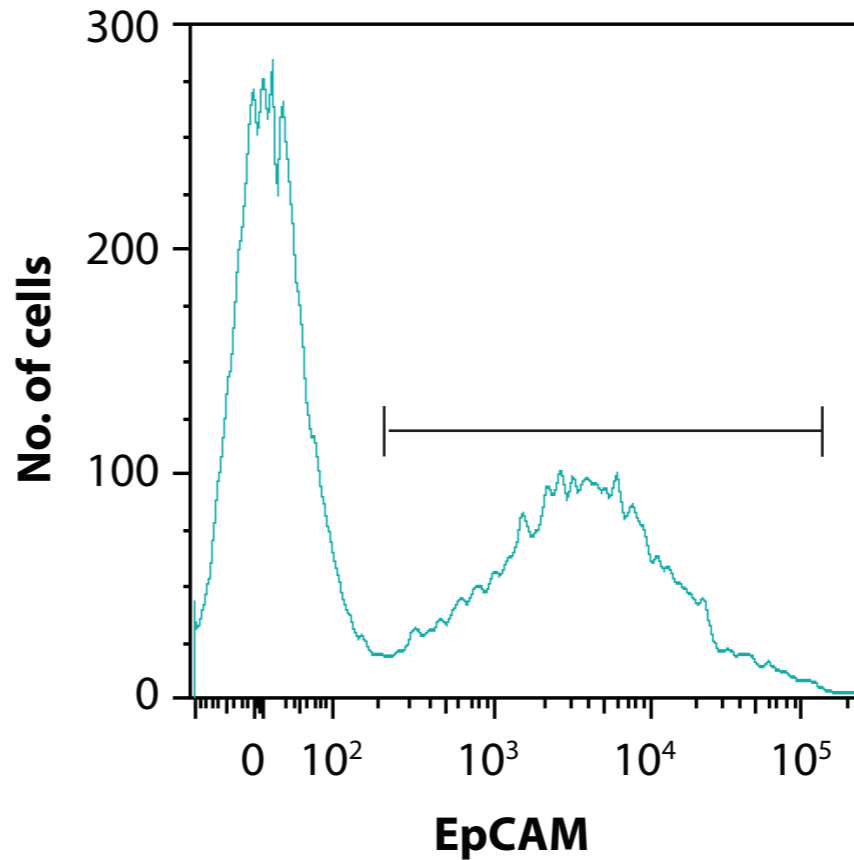

→ see data in  
Extended Data Fig. 7

**Supplementary Fig. 1 | Gating strategy for epithelial cells.**

Supplement: NIHMS1822948-supplement-sup_figure_1__gating_.pdf [file NIHMS1822948-supplement-sup_figure_1__gating_.pdf]
